# Supplementary material for: Redirecting Primary Metabolism to Boost Production of Tyrosine-Derived Specialised Metabolites in Planta
Source: PubMed Central journal article supplement (PMC6250739; doi:10.1038/s41598-018-33742-y), 2018-11-22
Supplement: 41598_2018_33742_MOESM1_ESM.pdf [file 41598_2018_33742_MOESM1_ESM.pdf]

**SUPPLEMENTARY INFORMATION TITLE PAGE**

**REDIRECTING PRIMARY METABOLISM TO BOOST PRODUCTION OF TYROSINE-  
DERIVED SPECIALISED METABOLITES *IN PLANTA***

**Alfonso Timoneda<sup>1\*</sup>, Hester Sheehan<sup>1\*</sup>, Tao Feng<sup>1</sup>, Samuel Lopez-Nieves<sup>2</sup>, Hiroshi Maeda<sup>2</sup>,  
Samuel Brockington<sup>1</sup>**

## SUPPLEMENTARY INFORMATION LEGENDS

**Supplementary Figure 1: Vector Maps: a, ADH $\alpha$ -BET; b ADH $\beta$ -BET; c, *nos::Luciferase***

**Supplementary Figure 2. LC-MS data for detected betalain constituents: a,** the relative percentage of betacyanins contributed by three main classes of detected pigments – betanidins, isobetanin, and betanin; MS spectra confirming identity of component betacyanins: **b,** full LCMS spectrum for beetroot hypocotyl sample; **c,** MS2 for the precursor ion 551.15; **d,** full LCMS spectrum for representative *ADH $\alpha$ -BET* sample; **e,** MS2 for the precursor ion 551.15

**Supplementary Figure 3. Absorbance measurement for *ADH $\alpha$ -BET* versus *ADH $\beta$ -BET* normalized to luciferase expression. a,** Absorbance of *ADH $\alpha$ -BET* versus *ADH $\beta$ -BET* for eight independent leaf replicates as measured by absorbance at 540nm, corrected for a chlorophyll *a* absorbance and normalized by luciferase expression; **b,** average and standard deviation of pigment absorption across all eight replicates for *ADH $\alpha$ -BET* versus *ADH $\beta$ -BET*. Error bars represent the standard deviation calculated for five technical replicates.

**Supplementary Table 1. Oligonucleotides used to isolate betalain pathway genes for vector constructs.**

# Supplementary Figure 1

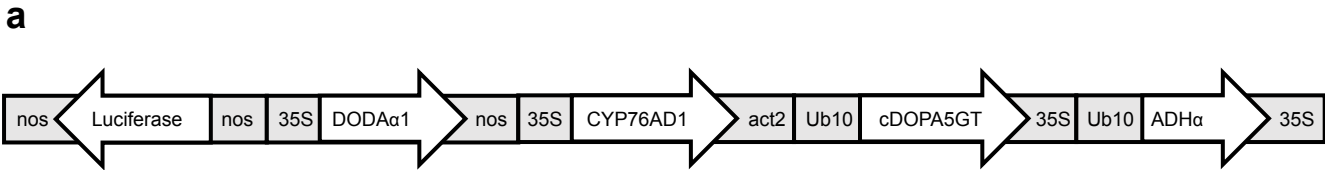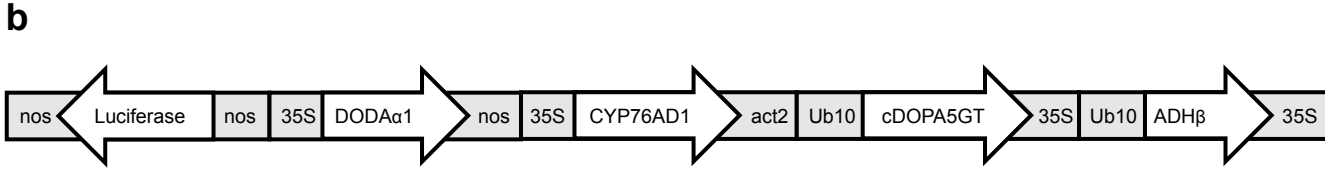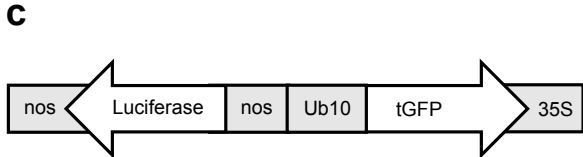

# Supplementary Figure 2

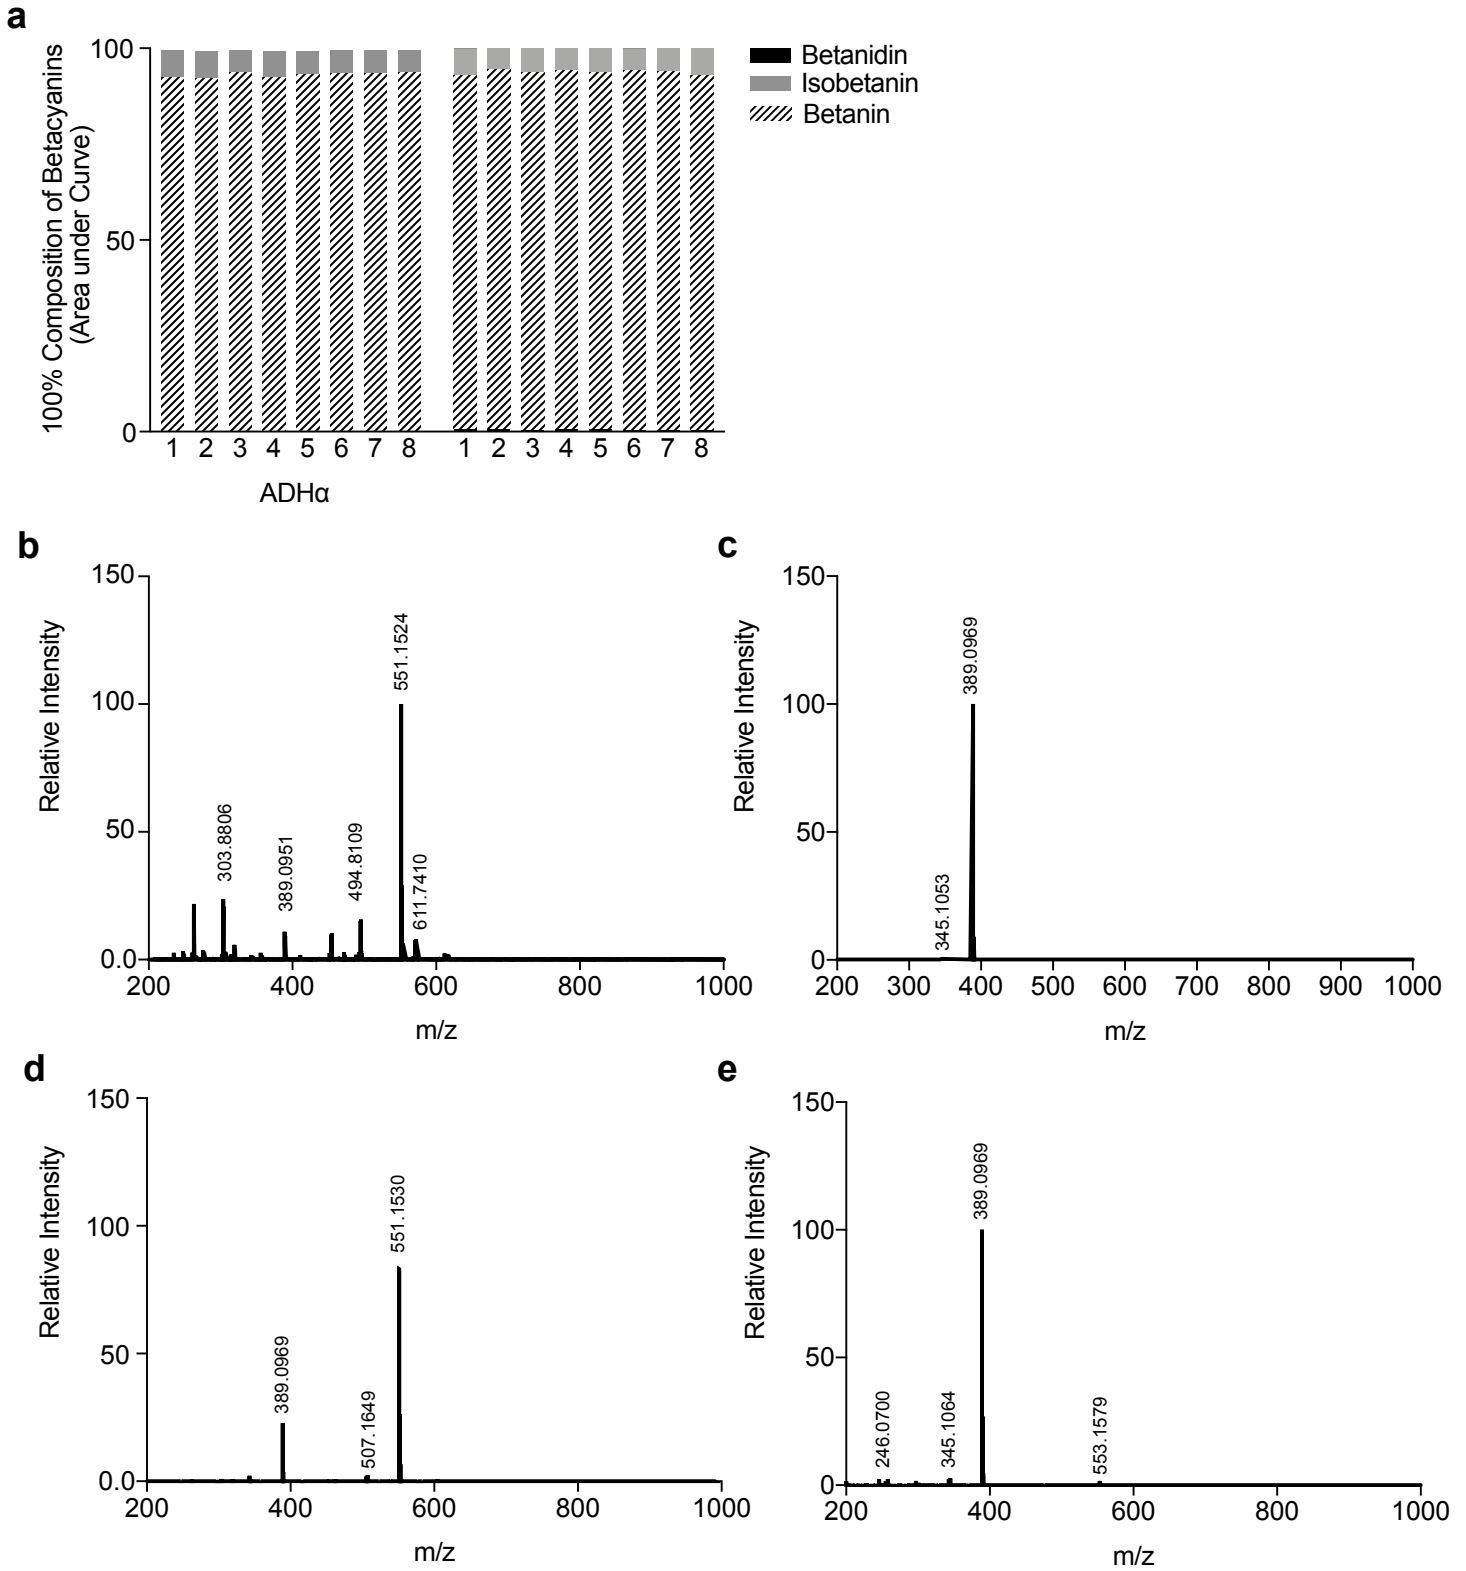

### Supplementary Figure 3

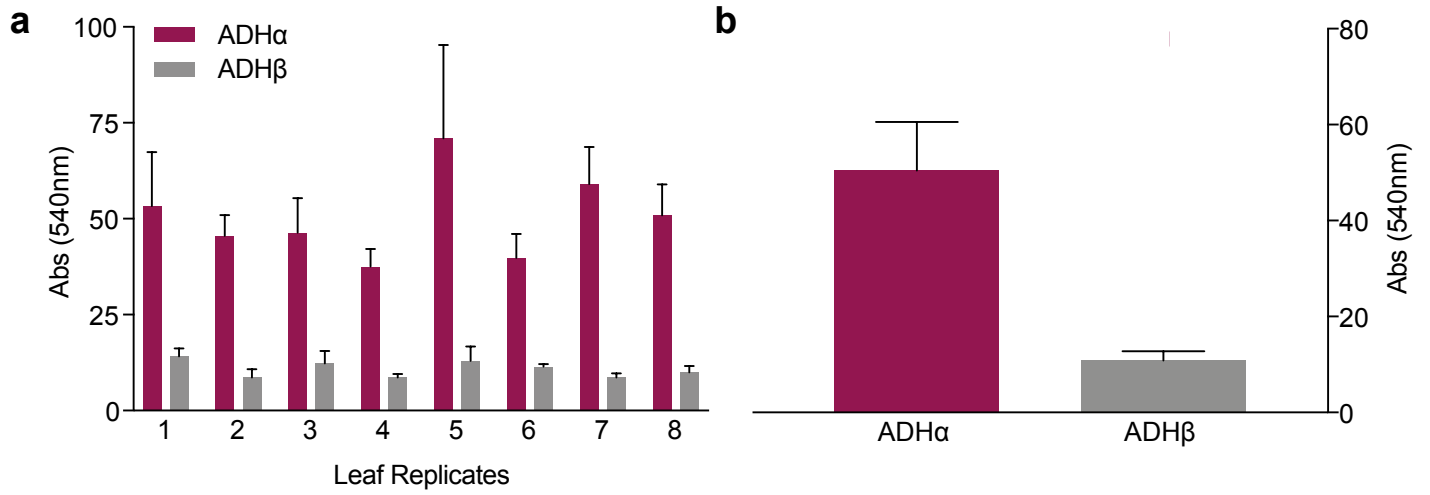

**Supplementary Table 1**

| <b>ID</b>    | <b>Sequence 5'-3'</b>          |
|--------------|--------------------------------|
| BvADHa_F     | ATGATTTCACTCTCTTCTTTTCATCC     |
| BvADHa_R     | CTATCTAGTACCATTAACCACCACTAAATC |
| BvADHb_F     | ATGCTTTCTCTCTCCTCCAC           |
| BvADHb_R     | TCAATTTGTCTCCGAATTTG           |
| BvDODA_a1_F  | ATGAAAATGATGAATGGAGAAG         |
| BvDODA_a1_R  | CTAGGCTGAAGTGAACCTTGTAG        |
| BvCYP76AD1_F | ATGGATCATGCAACATTAGCA          |
| BvCYP76AD1_R | TCAATACCTAGGTATTGGAATAAGTTTTAA |
| MjcDOPA5GT_F | ATGACCGCCATTAAAATG             |
| MjcDOPA5GT_R | TTATTGAAGAGAAGGTTCCAAC         |
